# Supplementary material for: RETRACTED ARTICLE: Newcastle disease virus enhances the growth-inhibiting and proapoptotic effects of temozolomide on glioblastoma cells in vitro and in vivo
Source: PubMed Central journal article supplement (PMC6068118; doi:10.1038/s41598-018-29929-y), 2018-07-31
Supplement: 41598_2018_29929_MOESM1_ESM.pdf [file 41598_2018_29929_MOESM1_ESM.pdf]

# Newcastle disease virus enhances the growth-inhibiting and proapoptotic actions of temozolomide on glioblastoma cells in vitro and in vivo

Yang Bai<sup>1</sup>, Yong Chen<sup>1</sup>, Xinyu Hong<sup>1</sup>, Xinrui Liu<sup>1</sup>, Xing Su<sup>2</sup>, Shanji Li<sup>1</sup>, Xuechao Dong<sup>1</sup>, Gang Zhao<sup>1\*</sup>, Yunqian Li<sup>1\*</sup>

1 Department of Neurosurgery, First Hospital of Jilin University, Changchun, China

2 Laboratory of Cancer Precision Medicine, First Hospital of Jilin University, Changchun, China

\*Correspondence to      Yunqian Li<sup>1\*</sup> 13943188080@163.com  
                                    Gang Zhao<sup>1\*</sup> zhao\_gangjlu@aliyun.com

# Supplementary Figure 1:

NDV MOI 0 0.1 1 10

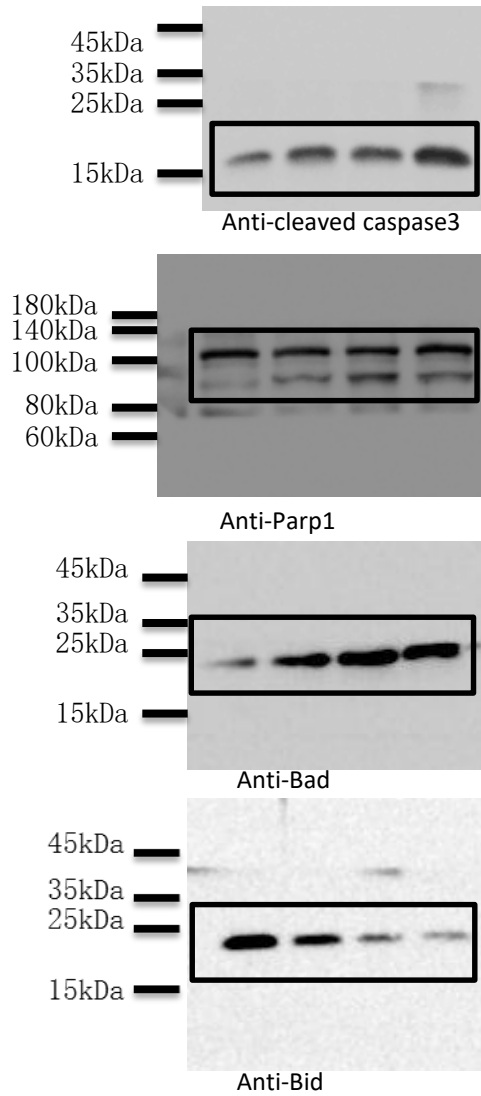

NDV MOI 0 0.1 1 10

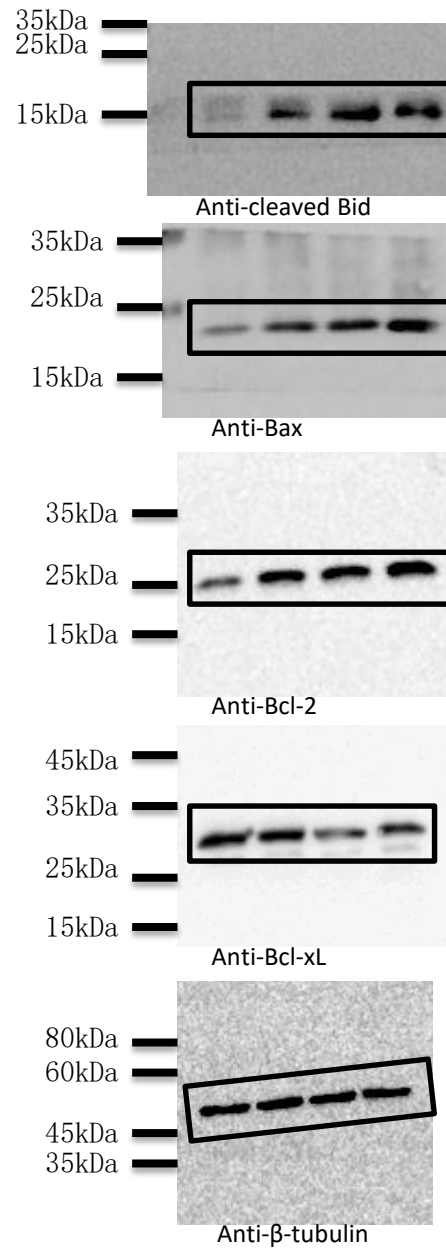

Supplementary Figure 1:  
Uncropped western blots  
used in figure 3 (A).  
The boxes indicate where the  
figure was cropped in the  
main text.

Supplementary Figure 2:  
Uncropped western blots  
used in figure 3 (B).  
The boxes indicate where the  
figure was cropped in the  
main text.

Supplementary Figure 2:

NDV MOI 0 0.1 1 10

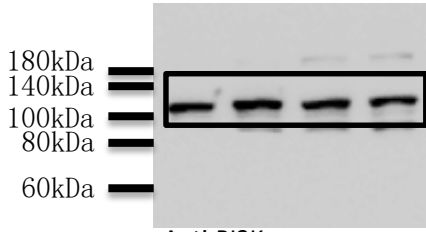

Anti-PI3K

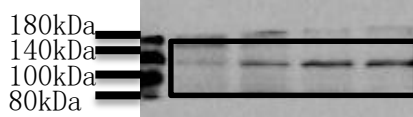

Anti-p-PI3K

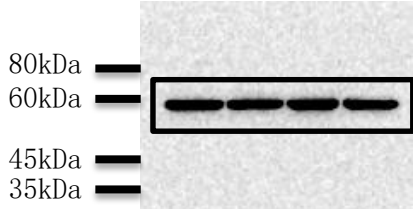

Anti-AKT

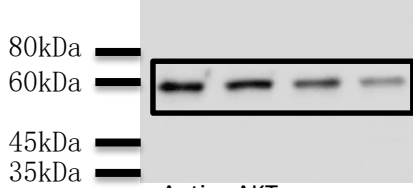

Anti-p-AKT

NDV MOI 0 0.1 1 10

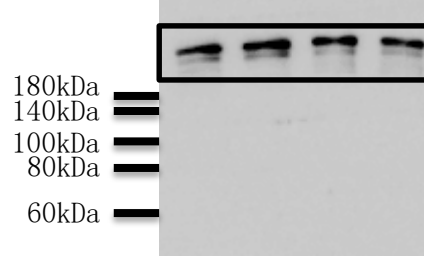

Anti-mTOR

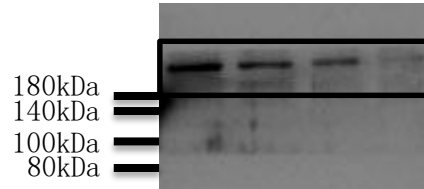

Anti-p-mTOR

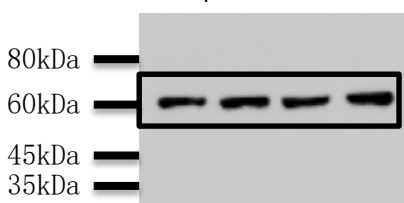

Anti-AMPK

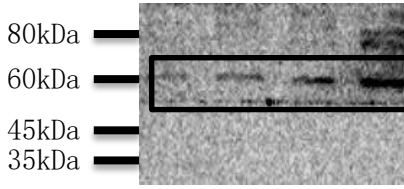

Anti-p-AMPK

NDV MOI 0 0.1 1 10

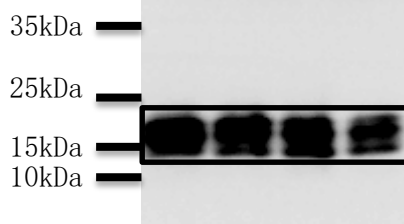

Anti-4EBP1

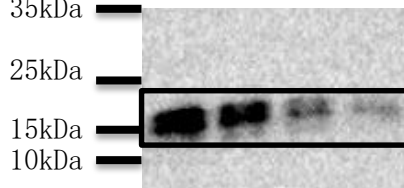

Anti-p-4EBP1

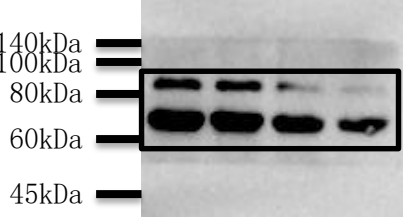

Anti-S6K

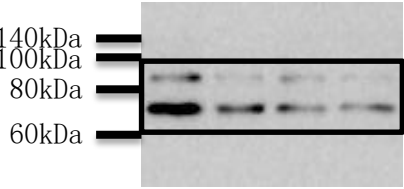

Anti-p-S6K

Supplementary Figure 3:

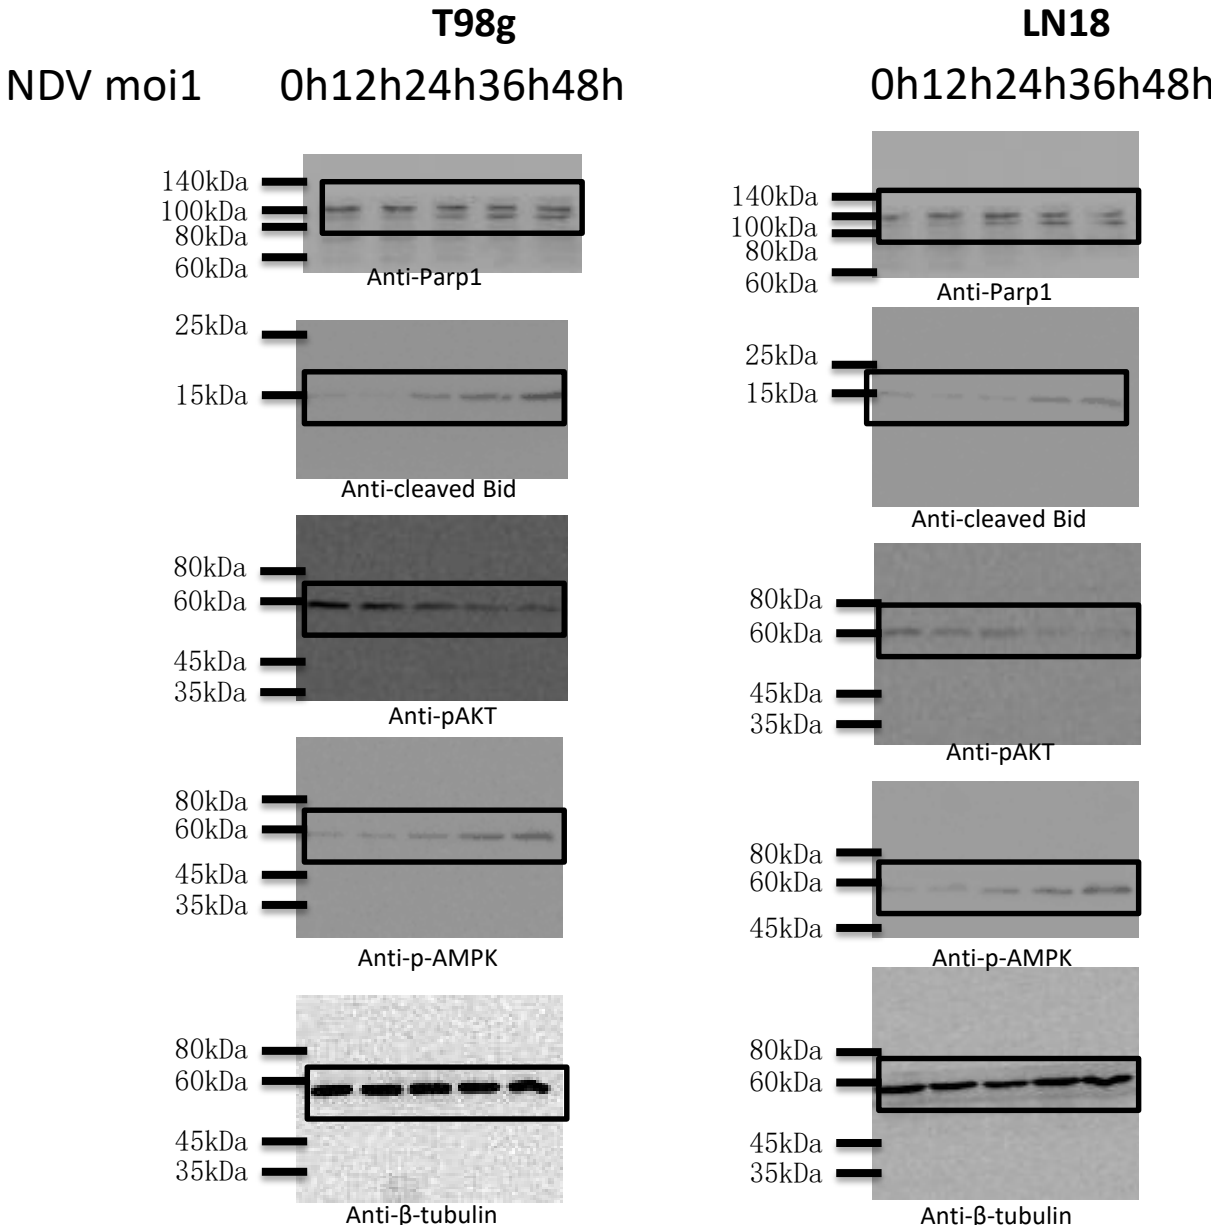

Supplementary Figure 3:  
Uncropped western blots used  
in figure 3 (C).The boxes  
indicate where the figure was  
cropped in the main text.

# Supplementary Figure 4:

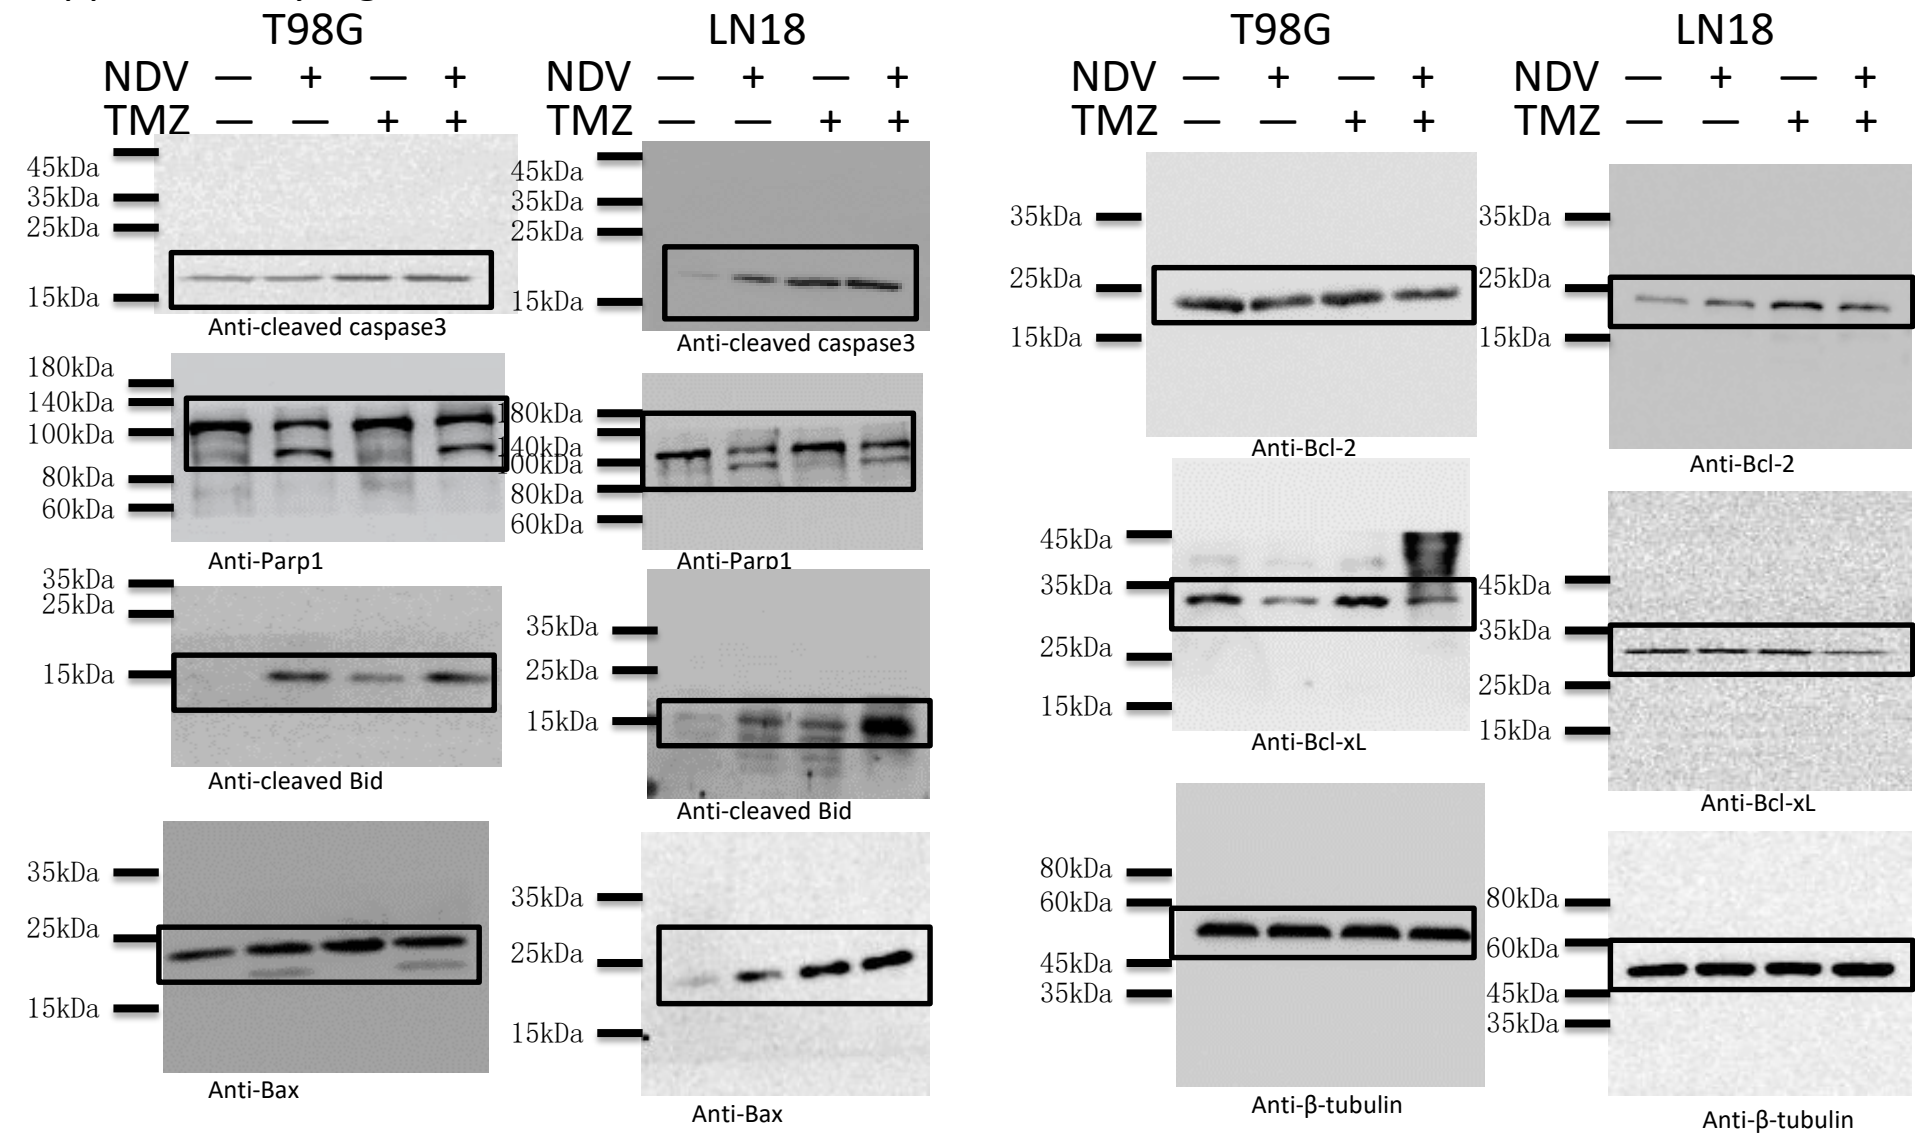

## Supplementary Figure 4:

Uncropped western blots used in figure 4 (A). The boxes indicate where the figure was cropped in the main text.

# Supplementary Figure 5:

## T98G

## LN18

|     |   |   |   |   |
|-----|---|---|---|---|
| NDV | - | + | - | + |
| TMZ | - | - | + | + |

|     |   |   |   |   |
|-----|---|---|---|---|
| NDV | - | + | - | + |
| TMZ | - | - | + | + |

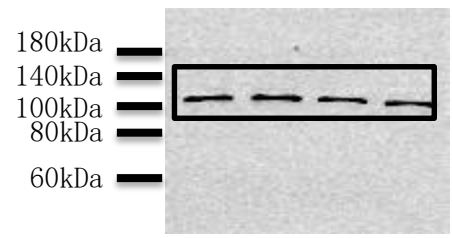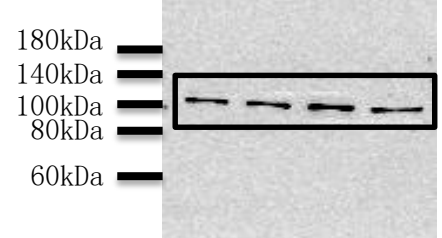

Anti-PI3K

Anti-PI3K

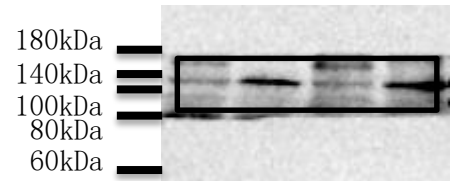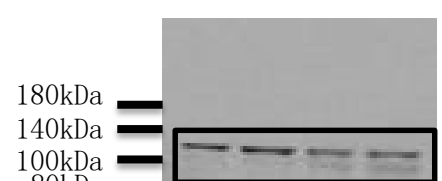

Anti-p-PI3K

Anti-p-PI3K

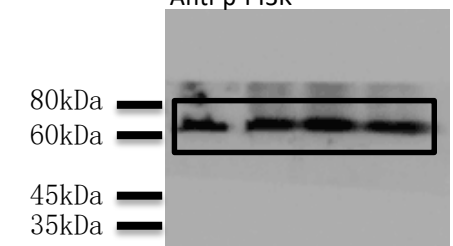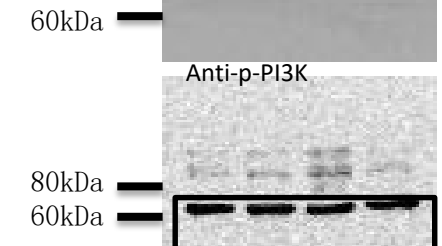

Anti-AMPK

Anti-AMPK

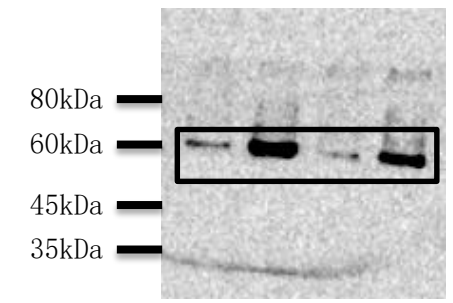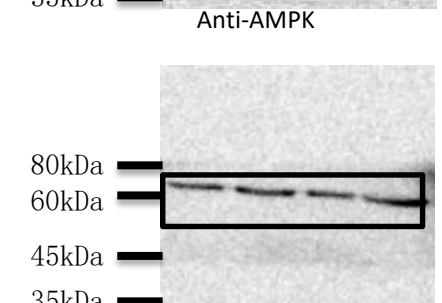

Anti-p-AMPK

Anti-p-AMPK

## T98G

## LN18

|     |   |   |   |   |
|-----|---|---|---|---|
| NDV | - | + | - | + |
| TMZ | - | - | + | + |

|     |   |   |   |   |
|-----|---|---|---|---|
| NDV | - | + | - | + |
| TMZ | - | - | + | + |

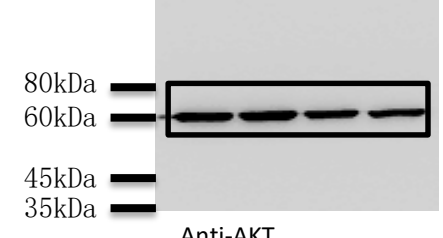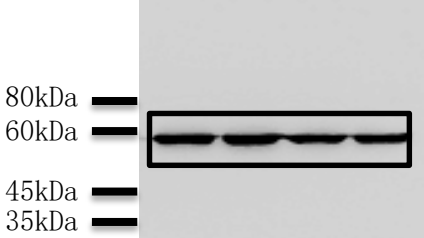

Anti-AKT

Anti-AKT

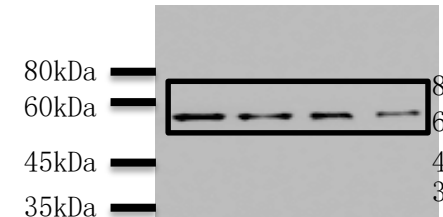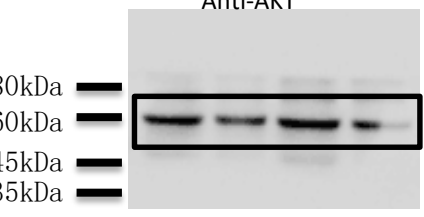

Anti-p-AKT

Anti-p-AKT

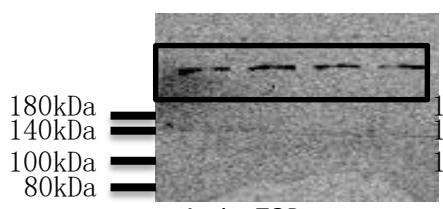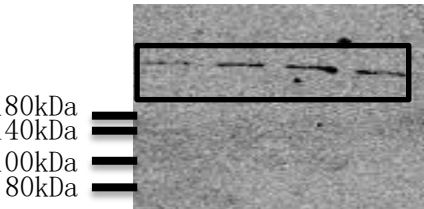

Anti-mTOR

Anti-mTOR

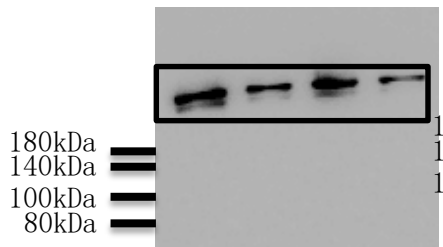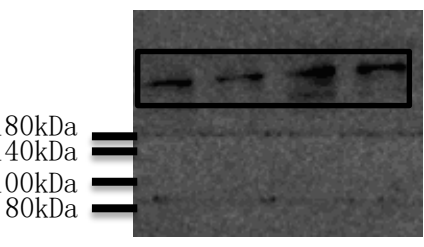

Anti-p-mTOR

Anti-p-mTOR

Supplementary Figure 6:

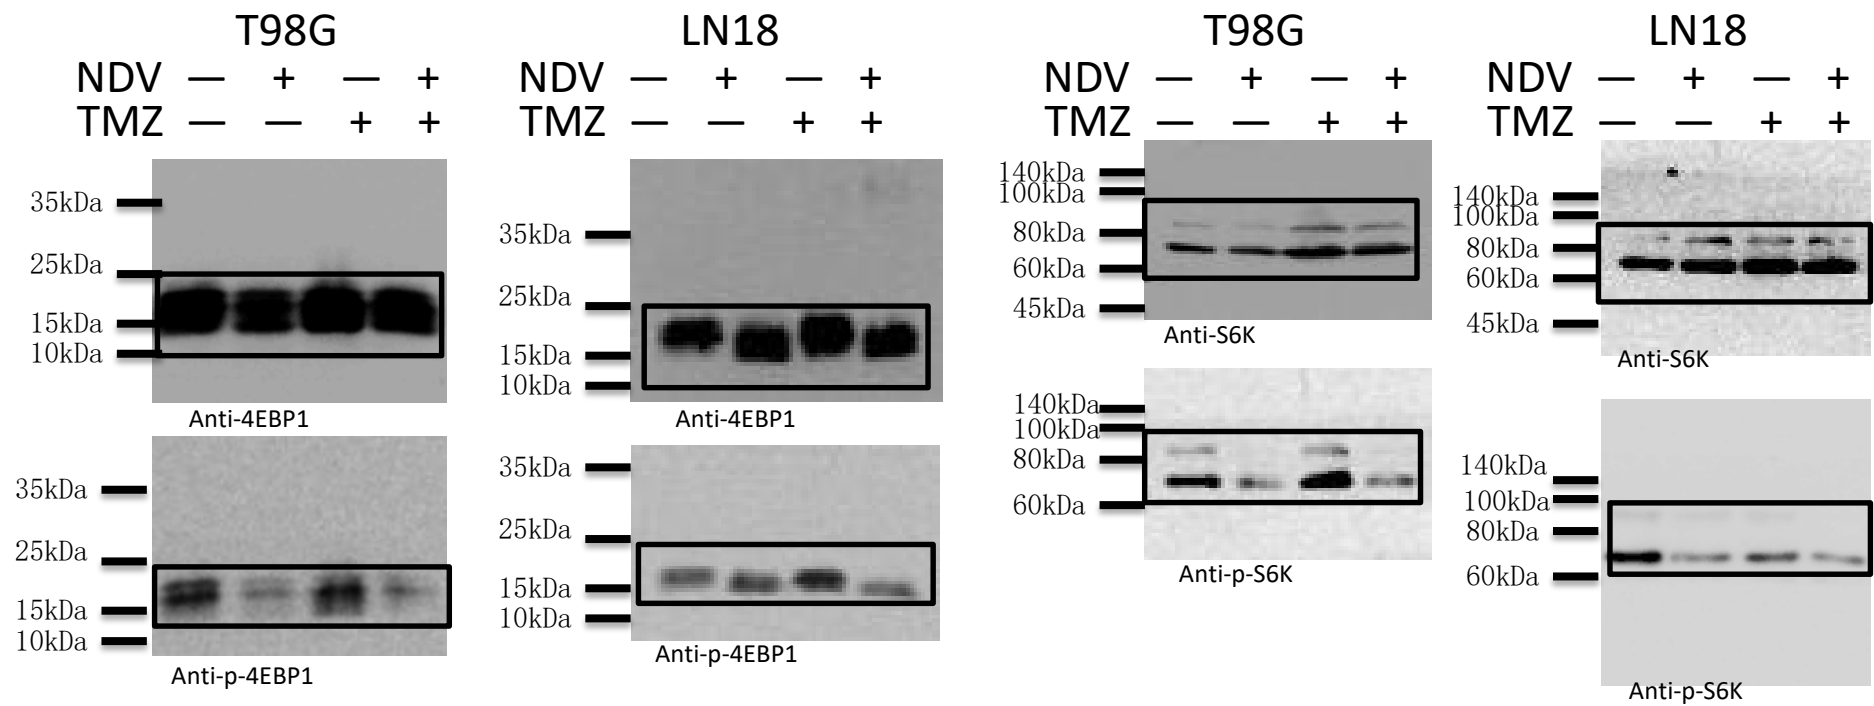

Supplementary Figure 5-6:  
 Uncropped western blots used in figure 4 (B). The boxes indicate where the figure was cropped in the main text.

# Supplementary Figure 7:

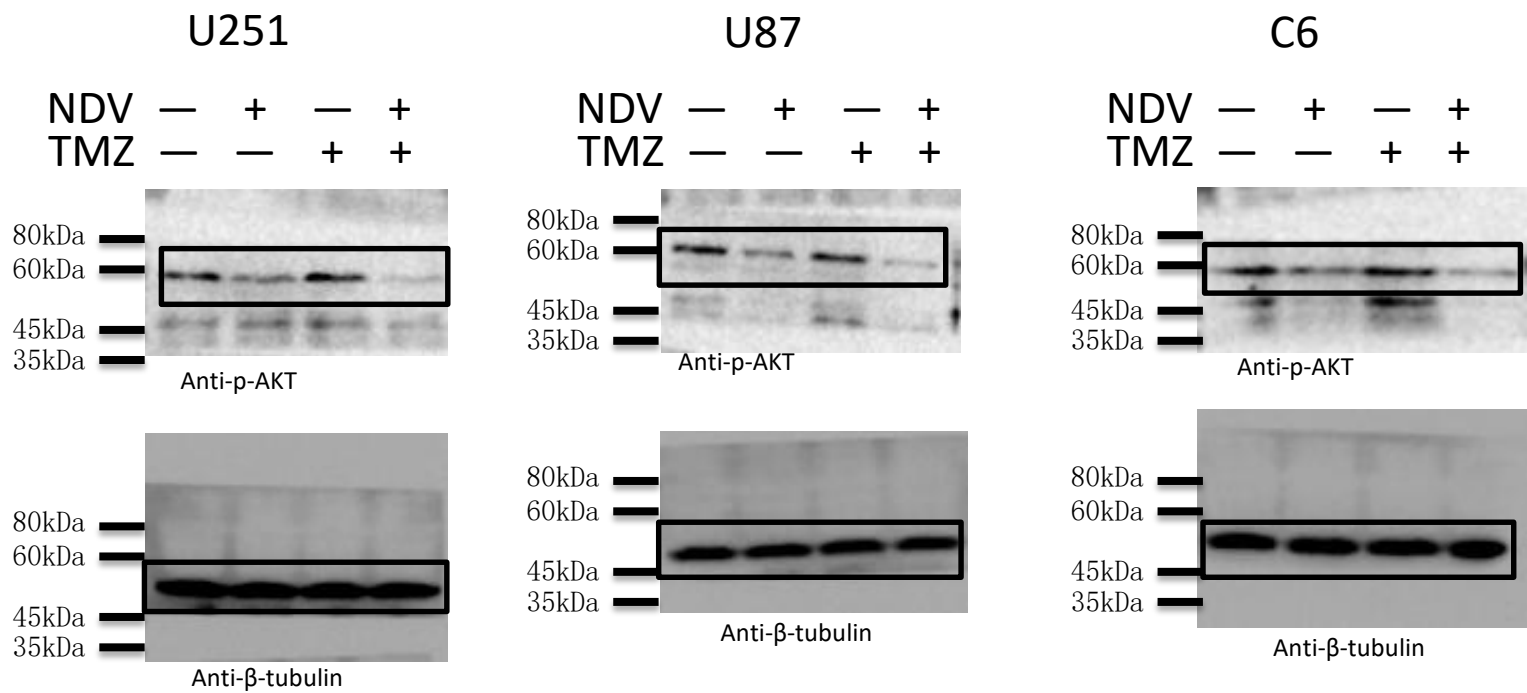

Supplementary Figure 7:  
Uncropped western blots used in figure 4 (C). The boxes indicate where the figure was cropped in the main text.



Supplementary Figure 8:

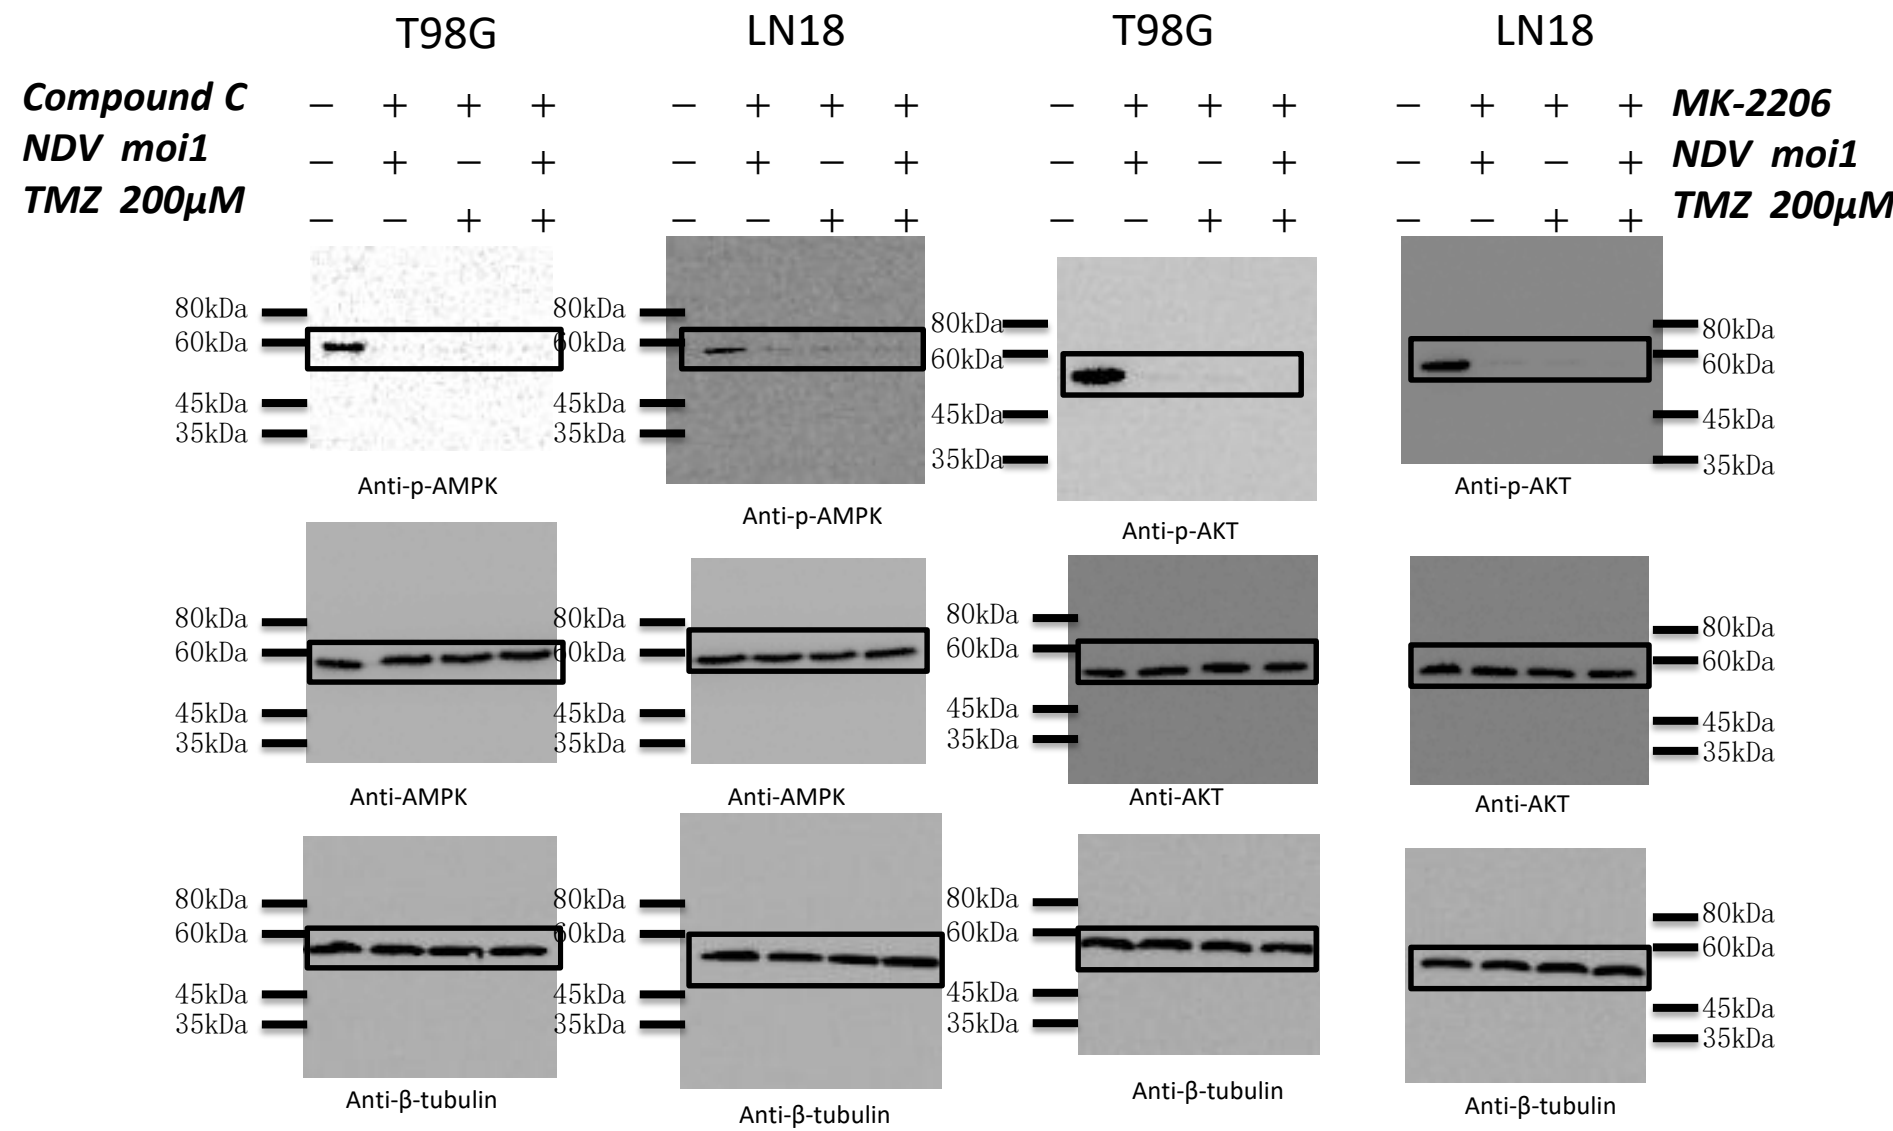

Supplementary Figure 8:  
 Uncropped western blots used in figure 4 (D&F).The boxes indicate where the figure was cropped in the main text.

Supplementary Figure 9:

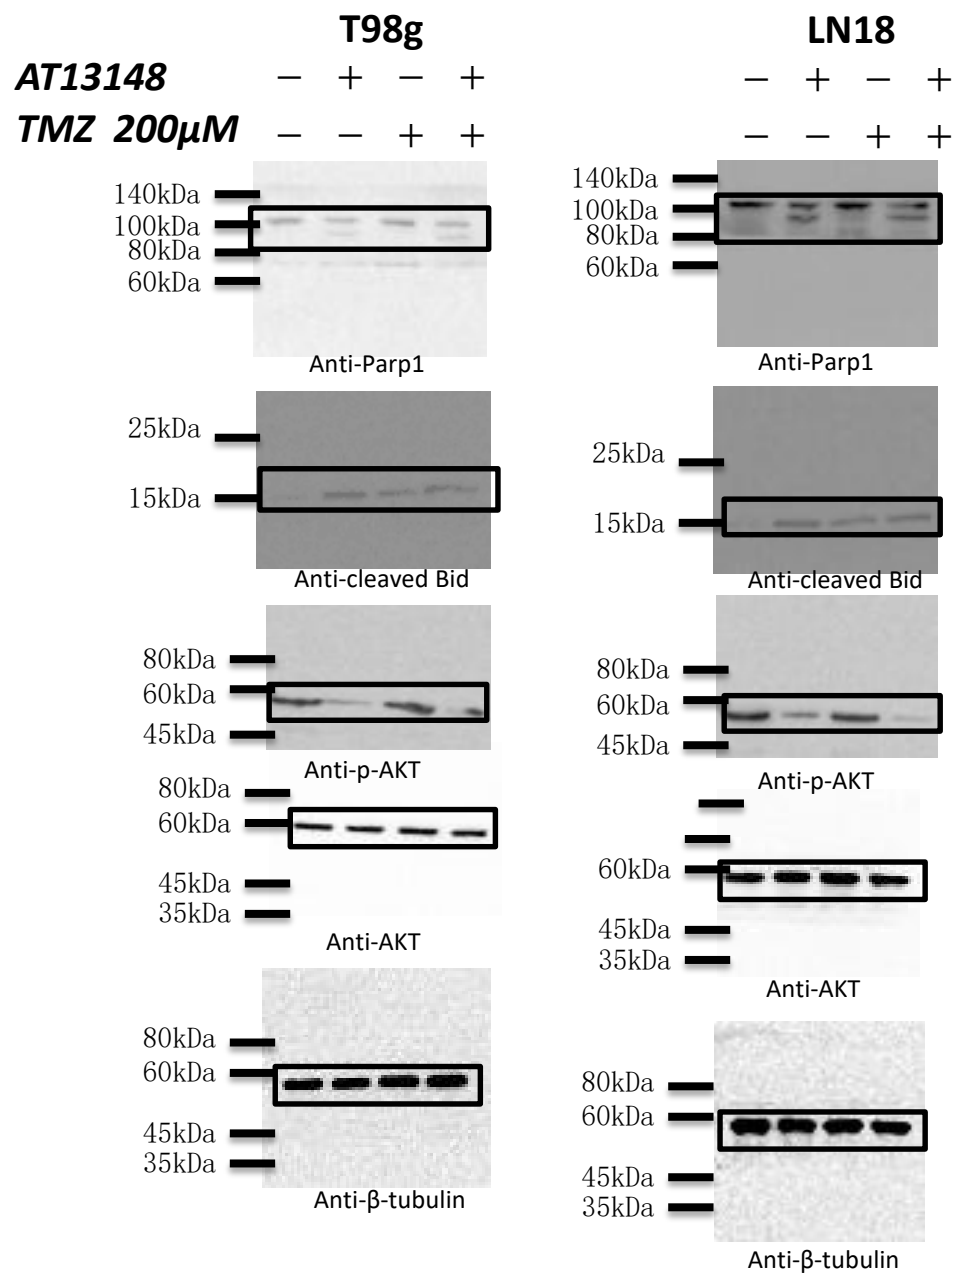

Supplementary Figure 9:  
 Uncropped western blots used  
 in figure 4 (I). The boxes  
 indicate where the figure was  
 cropped in the main text.
